# Supplementary material for: The effect of Static Chamber's Base on N 2 O Flux in Drip Irrigation
Source: Copernicus journal article supplement (doi:10.5194/egusphere-2022-141), 2022-04-20
Supplement: Supplementary file [file egusphere-2022-141-RC1-supplement.pdf]

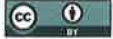

## The effect of Static Chamber's Base on N<sub>2</sub>O Flux in Drip Irrigation

Shahar Baram<sup>1</sup>, Asher Bar-Tal<sup>1</sup>, Alon Gal<sup>1,2</sup>, Shmulik P. Friedman<sup>1</sup>, David Russo<sup>1</sup>

<sup>1</sup>Institute for Soil, Water and Environmental Sciences, Agricultural Research Organization (ARO),  
Volcani Institute, 68 HaMacabim Rd. P.O Box 15159, Rishon Lezion 7505101, Israel  
<sup>2</sup>The Mina and Everard Goodman Faculty of Life Sciences, Bar-Ilan University, Ramat Gan, Ramat-Gan 52900, Israel.

Correspondence to: Shahar Baram (sbaram@volcani.agri.gov.il)

### Abstract

Static chambers are commonly used to provide *in-situ* quantification of N<sub>2</sub>O fluxes. Despite their benefits, when left in the field, the physicochemical conditions inside the chamber's base may differ from the ambient, especially in drip-irrigated systems. This research aimed to study the effects of static chamber bases on water and N-forms distribution and the impact it has on N<sub>2</sub>O measurements in drip irrigation. N<sub>2</sub>O emissions were measured in a drip-irrigated avocado orchard for two years, using bases with a dripper at their center (In) and bases installed adjacent to the dripper (adjacent). During the irrigation/fertigation season, the measured N<sub>2</sub>O<sub>In</sub> fluxes were greater than the N<sub>2</sub>O<sub>Adjacent</sub> fluxes (0.82 ± 0.15 vs. 0.36 ± 0.05 ng cm<sup>-2</sup> sec<sup>-1</sup>). In contrast, during the winter, when the orchard is not irrigated or fertilized, insignificant differences were observed between the measured N<sub>2</sub>O<sub>Adjacent</sub> and N<sub>2</sub>O<sub>In</sub> fluxes. Three dimensional simulations of water flow, and N-forms transport and transformations showed two opposing phenomena (a) increased water contents, N concentrations, and downward flushing when the dripper is placed inside the base, and (b) hampering of the lateral distribution of water and solutes into the most bio-active part of the soil inside the base when the base is placed adjacent to the dripper. It also showed that both "In" and "adjacent" practices underestimate the "true" cumulative flux from a dripper with no base by ~25% and ~50%, respectively. A nomogram in a non-dimensional form corresponding to all soil textures, emitter spacings and discharge rates, was developed to determine the optimal diameter of an equivalent cylindrical base to be used along a single dripline.

### 1. Introduction

Static chambers are commonly used to provide *in-situ* quantification of N<sub>2</sub>O fluxes from soil-plant systems (Clough et al., 2020). Ideally, such chambers should be as large as feasibly possible in order to capture spatial variation, where most chambers cover a surface area of 0.03 – 0.25 m<sup>2</sup>. Commonly, static chambers are built from two separate parts: (i) bases (also known as collars or anchors) that are pushed into the ground, and (ii) chambers that are placed and sealed onto the bases during flux measurements. It is acknowledged that static chambers suppress the gas concentration gradient at the soil-atmosphere interface. The magnitude of the chamber-induced errors is known to increase with increased chamber deployment time, decreased chamber height, greater soil air-filled porosity (Venterea, 2010). Different

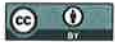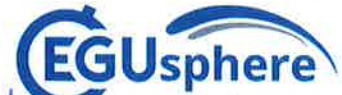

talking about just one base

base's

40 methods have been developed to quantify/correct these errors (Venterea, 2010; Venterea et al., 2020). Proper use of static chambers calls for minimal disturbance of the soil surface and the prevention of lateral diffusion of N<sub>2</sub>O beneath the bases' wall. To reduce perturbation of the soil structure, which can release pulses of gases, and to minimize the influence on the carbon and nitrogen turnover in the bases (mainly the decaying process of cut roots) (Clough et al., 2020), bases are installed prior to the beginning of the experiment and left in the same location for the duration of the project. During installation, bases need to be inserted to at least the depth where N<sub>2</sub>O concentrations are not being perturbed by feedback effects from the chamber (Rochette and Eriksen-Hamel, 2008; Healy et al., 1996; Hutchinson and Livingston, 2001). Despite their benefits, when bases are left in the field, atypical soil water contents, 45 aeration, temperature, and microbial processes may develop in them (Clough et al., 2020). Such perturbations must be minimized or avoided, especially in drip-fertigation systems where the localized concentrations of N and water content may increase the potential for N<sub>2</sub>O emissions (Smart et al., 2011; Baram et al., 2018; Burton et al., 2008; Zebarth et al., 2008).

50 A review of the published literature in which static chambers were used <sup>in</sup> drip-irrigated fields shows inconsistency regarding the chamber's location relative to the emitter (dripper). In many studies, chamber's bases (i.e., metal or PVC frame) are installed adjacent to the drip lines to depths of 5 to 13 cm, prior to the beginning of the experiment and left in the same location for the duration of the project (Garland et al., 2014; Baram et al., 2018; Alsina et al., 2013; Verhoeven and Six, 2014; Tian et al., 2017; Scheer et al., 2008; Fentabil et al., 2016). An additional strategy is to install the bases to similar depths, 55 a day to few hours before sampling (Sanchez-Martín et al., 2010; Sánchez-Martín et al., 2008). Both strategies are applied to reduce perturbation of the soil structure following the base's insertion, as discussed above. In such practices, the base serves as a hydraulic barrier that prevents lateral movement of water from the dripper into the soil volume confined by it, especially close to the soil surface. Accordingly, the water-filled pore-space (WFPS; the ratio between the volumetric water content and the porosity, also known as "water saturation degree", S) and the N-species concentrations in the base will 60 most likely differ from the ambient ones. Sanchez-Martín et al. (2010), acknowledged these biases (especially in the water content) and, therefore, removed the bases after sampling, allowing lateral redistribution between sampling days. Wolff et al. (2017) and Vallejo et al. (2014) tried to overcome these limitations by installing the bases and sampling the fluxes directly after the fertigation event. 65 However, as mentioned before, such a sampling method could be affected by perturbation of the soil structure and root damage (Clough et al., 2020). Placement of drippers above the bases was also suggested as a way to minimize the differences between the soil water content and N concentrations inside the bases and that of the surroundings (Heller et al., 2010; Garland et al., 2014). Another suggestion was to split the dripper discharge into two separate drippers, one in the bases and the other outside 70 (Fentabil et al., 2016). Though these latter methods seem to overcome the base's disturbance of water and solute distribution in the topsoil, their actual impact on water and N-species distribution in the soil inside the base and their effect on the N<sub>2</sub>O fluxes were never tested.

spelling

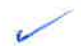

Many models have been developed to simulate N<sub>2</sub>O emissions from soils. In all models, N<sub>2</sub>O emission results mainly from nitrification and denitrification reactions, which in turn are affected by the following

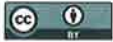

75 parameters in the soil: (a) mineral N concentration [namely, nitrate ( $\text{NO}_3^-$ ) and ammonium ( $\text{NH}_4^+$ )], (b)  
WFPS as a proxy for soil aeration and gas diffusion coefficient, (c) temperature, (d) pH, (e) redox  
potential, and (f) carbon availability (Rabot et al., 2015; Hénault et al., 2019; Wu and Zhang, 2014). This  
research aimed to study the effects of static chambers <sup>bases</sup> on water and N-forms distribution <sup>during</sup> inside it  
and the impact it ~~has~~ on  $\text{N}_2\text{O}$  emission measurements <sup>by</sup> drip irrigation. We used both field measurements  
80 and three-dimensional (3-D) simulations of flow and transport in order to test the effect of the base  
diameter and its location relative to the dripper lateral on  $\text{N}_2\text{O}$  emissions.

## 2. Materials and methods

### 2.1. Study site and $\text{N}_2\text{O}$ measurements

*Nitrous oxide*  
85  $\text{N}_2\text{O}$  fluxes were measured over a two-year period in a drip-irrigated avocado orchard. The orchard is  
located near Kibbutz-Yasur in Western Galilee, Israel. The soil at the site is a Vertisol (58% clay  
dominated by montmorillonite) (Nemera et al., 2020). The climate at the site is Mediterranean,  
characterized by a relatively long dry season (April – October) requiring irrigation and a distinct rainy  
period during the winter (November – March). The trees are planted 3.5m apart on ridges (1.6m wide,  
0.4m high), with 6m between rows. Each row of trees was irrigated with a set of two driplines (laterals),  
90 located 0.9m apart along both sides of the trees, with 0.5m spaced 1.6 L h<sup>-1</sup> drippers (UNIRAM, Netafim).  
From April through November, the orchard was fertigated every other day, using treated wastewater  
enriched with an ammonium sulfate nitrate solution ( $\text{NH}_4:\text{NO}_3 = 3:1$ ), maintaining 50 – 70 mg-N L<sup>-1</sup> in  
the fertigation solution.

*avoid starting sentences with chemical nomenclature.*  
95 From June 2018 through June 2020,  $\text{N}_2\text{O}$  fluxes were measured at mid-morning using  
accumulation static chambers that were installed at 12 random locations in the avocado orchard. At each  
location, two chamber bases were inserted, one with a dripper at its center (In) and one adjacent to the  
dripper (adjacent) (Fig. 1). The bases were made from opaque polyvinylchloride (PVC) rings, 10 cm high  
and 19 cm internal diameter (ID, surface area of 283.5 cm<sup>2</sup>). The rings were inserted to a depth of 6-8  
100 cm two weeks prior to the start of the sampling campaign and remained in the soil for the duration of the  
experiment. The chambers were built from a 20 cm sewer PVC cup (volume of 3119 cm<sup>3</sup>), equipped with  
a vent (3 mm Swagelok bulkhead union with a 12 cm long coiled copper tube, 1.5 mm i.d.), covered with  
a bubble reflective foil and a rubber skirt to ensure sealing with the base. Fluxes were measured in real-  
time by circulating the headspace in the static gas chamber via Teflon tubes into a Fourier-transform  
infrared spectrometer (FTIR; Gasmeter DX4000, Gasmeter Technologies, Finland). During the enclosure  
105 period,  $\text{N}_2\text{O}$  concentrations were recorded every five seconds, <sup>with</sup> an average <sup>of</sup> 50 reads.  $\text{N}_2\text{O}$  *Nitrous oxide*  
fluxes ( $q$ ) [g cm<sup>-2</sup> sec<sup>-1</sup>] were calculated based on the linear slope, representing the increase in  $\text{N}_2\text{O}$   
concentration throughout 4 to 8 min enclosure time (Eq. 1). The Pearson's correlation coefficient ( $r^2$ ) was  
calculated for the linearity of the slope, and readings were accepted when  $r^2$  was >0.70.

$$[1] \quad q = \frac{dC_{\text{gas}}}{dt} * \frac{V_{\text{chamber}}}{A_{\text{chamber}}} * \frac{P}{RT} * M_w$$

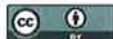

110 where  $C_{\text{gas}}$  is the measured gas concentration [ $\mu\text{L L}^{-1}$ ],  $t$  is the time [sec],  $V_{\text{chamber}}$  [ $\text{cm}^3$ ] and  $A_{\text{chamber}}$  [ $\text{cm}^2$ ]  
are the chamber volume and surface area respectively,  $P$  is the ambient pressure [atm],  $R$  is the gas law  
constant [ $0.08206 \text{ L atm mol}^{-1} \text{ }^\circ\text{K}^{-1}$ ],  $T$  is the temperature [ $^\circ\text{K}$ ], and  $M_w$  is the molecular weight of the gas  
[ $\text{g mol}^{-1}$ ]. Daily values were obtained following the method of Parkin and Kaspar (2006), using a  $Q_{10}$   
value of 3.72.

## 2.2. Modelling water flow, nutrients fate, and $\text{N}_2\text{O}$ emissions

### 115 2.2.1. The physical domain and its parametrization

Employing a Cartesian coordinate system ( $x_1, x_2, x_3$ ), where  $x_1$  directed downwards, a subplot of the orchard  
consisting of a 3-D, spatially heterogeneous, variably saturated flow domain which extends over  $L_1=2\text{m}$ ,  
 $L_2=1.5\text{m}$ , and  $L_3=10\text{m}$  along the  $x_1, x_2$ , and  $x_3$  axes, respectively, is considered here. The subplot includes  
two adjacent tree rows, located  $6\text{m}$  apart, with four trees, located  $3.5\text{m}$  apart, along each row (Fig. SI-1)

120 Following Russo et al. (2020), the van Genuchten (1980) (VG) five-parameter model (*i.e.*,  
saturated conductivity,  $K_s$ , shape parameters,  $\alpha$  and  $n$ , the saturated,  $\theta_s$ , and residual,  $\theta_r$ , values of water  
content,  $\theta$ ), was implemented here for the local description of the constitutive relationships for  
unsaturated flow. Based on previous studies (e.g., Russo et al., 1997; Russo and Bouton, 1992), it is  
assumed here that each of the VG parameters is a second-order stationary, statistically anisotropic,  
125 random space function, characterized by a constant mean, and a two-point covariance. Parameters of the  
latter, the variance and the correlation length-scales, were adopted from Russo and Bouton (1992). Grain-  
size distribution data was obtained by the laser diffraction method (Eshel et al., 2004) from  $0.3\text{m}$ -segments  
of five soil cores extending to a depth of  $1.2\text{m}$ . The data was used to estimate the local-scale VG parameters  
by an optimization procedure. For more details see Russo et al. (2020). Mean values of the VG parameters  
130 were estimated using the soil texture-based procedure suggested by Mishra et al. (1989). Details of the  
generation of the 3-D, cross-correlated realizations of the spatially heterogeneous VG parameters are given  
in Russo et al. (2006). Mean values and coefficients of variation (CV) of the resultant VG parameters are  
given in Table 1 of Russo et al. (2020). The numerical grid used for the generation of the 3-D VG  
parameters' field, was modified in order to account for the application of water by the drip irrigation system  
135 and for the geometry of the ridges. For more details, see Russo et al. (2020).

In addition, deterministic molecular diffusion coefficient  $D_0$  for chloride ( $\text{Cl}^-$ ), nitrate ( $\text{NO}_3^-$ ) and  
ammonium ( $\text{NH}_4^+$ ) in water,  $D_0=5.4 \cdot 10^{-5} \text{ m}^2 \text{ d}^{-1}$ , dimensionless Henry's constant for  $\text{N}_2\text{O}$ ,  $K_{H1}=0.2$ , and pore-  
scale dispersion tensor (with longitudinal dispersivity,  $\lambda_L=2 \times 10^{-3} \text{ m}$  and transverse dispersivity,  $\lambda_T=1 \times 10^{-3}$   
140  $\text{m}$ ) (Perkins and Johnston, 1963), were considered in the simulations. First-order rate constants for  
nitrification and denitrification,  $K_1$  and  $K_2$ , respectively, and liquid-solid partitioning coefficient for  
ammonium,  $K_{d1}$ , were taken into account as depth-dependent, implementing values within the range  
suggested by Lotse et al. (1992). Estimates of the root uptake coefficients for ammonium and nitrate,  $K_{u1}$   
and  $K_{u2}$ , respectively, were calculated by extending the method of Nye and Tinker (1977); for more  
details see Russo et al. (2013). Root distribution data, adopted from Salgado and Cautin (2008), were  
145 employed in order to construct a time-invariant, normalized root depth-distribution function for the  
avocado trees.



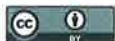

### 2.2.2. Quantification of the flow and the transport

Considering water and <sup>N</sup>nitrogen extraction by plant roots, water flow and solute (<sup>N</sup>ammonium, <sup>N</sup>nitrate, and <sup>Cl</sup>chloride) transport in the 3-D, unsaturated, spatially heterogeneous flow system were simulated  
150 employing numerical solutions of the 3-D Richards equation and the 3-D single-region, advection-dispersion equation (ADE), respectively. Following Russo et al. (2015), the flow model was modified to account for irrigation by drippers. The iterative procedure described in Russo et al. (2006) was employed in order to determine the size of the time-dependent ponding area that may develop around the drippers at the soil surface during an irrigation event. Furthermore, following Russo et al. (2020), the sink term  
155 representing water uptake by the plant roots, which appears on the right-hand side of the Richards equation, was modified to account for the effect of the oxygen availability on water uptake. The maximization iterative (MI) approach proposed by Neuman et al. (1975) was adopted here in order to calculate water uptake by the plant roots and, concurrently, actual transpiration rate,  $\tau_a(t)$ .

*already defined on L136-137*

Following Russo et al. (2013), the ADE was modified to account for <sup>N</sup>nitrogen transformations and uptake by plants' roots in the soil-water-plant-atmosphere system. In addition, the competition between <sup>Cl</sup>chloride and <sup>NO<sub>3</sub><sup>-</sup>nitrate and its effect on the extraction of <sup>N</sup>nitrogen by the plant roots, and the inhibition of nitrification induced by <sup>Cl</sup>chloride were taken into account. For more details, see Russo and Kurtzman (2019). The uptake of <sup>NO<sub>3</sub><sup>-</sup>nitrate and <sup>NH<sub>4</sub><sup>+</sup>ammonium by the plants' roots was also calculated by a MI approach described by Eq. 6 in Russo et al. (2013).</sup></sup></sup>

165 <sup>N<sub>2</sub>O</sup> emissions were calculated based on Hénault et al. (2005) and Hénault et al. (2019), accounting for nitrification and denitrification driven emissions.  $N_2O$  flux during denitrification ( $N_2O_{denit}$ ;  $mg-N\ m^{-2}\ d^{-1}$ ) was calculated as a combination of the potential denitrification rate ( $D_F$ ;  $mg-N\ m^{-2}\ d^{-1}$ ) and response functions to several environmental factors (Hénault et al. 2005):

$$\text{Eq. 2} \quad N_2O_{denit} = D_F \cdot F_W \cdot F_N \cdot F_T \cdot \tau_{max}$$

Where  $F_W$  is the denitrification response factor to the soil WFPS, assuming the WFPS parameter serves  
170 as a proxy of the oxygen availability for microorganisms (Supporting information (SI) Eq-S11).  $F_N$  is the denitrification response factor to soil <sup>NO<sub>3</sub><sup>-</sup>nitrate</sup> content (dimensionless) (based on Michaelis–Menten saturation curve) (Eq-S12),  $F_T$  is the denitrification response factor to soil temperature (Eq-S13),  $\tau_{max}$  is the maximum ratio of  $N_2O$  to denitrified nitrate under anaerobic incubations (in this study  $\tau_{max} = 0.3$ ).  $N_2O$  production during nitrification ( $mg-N\ m^{-2}\ d^{-1}$ ) was defined by Eq. 3 (Hénault et al. 2005):

$$\text{Eq. 3} \quad \begin{aligned} N_2O_{nit} &= z N_A, & WFPS < 0.62 \\ N_2O_{nit} &= \tau_{max} z N_A, & WFPS \geq 0.62 \end{aligned}$$

175 Where  $z$  is the proportion of nitrified nitrogen emitted as  $N_2O$  (in this study  $z = 0.006$ ), and  $N_A$  is the actual areal nitrification rate ( $mg-N\ m^{-2}\ d^{-1}$ ).

Details of the flow and the transport equations and the numerical schemes employed to solve them are given elsewhere (Russo and Kurtzman, 2019; Russo et al., 2013).

### 2.2.3. Implementation

180 Meteorological data collected in the Yasur orchard were used to estimate the reference evapotranspiration,  $ET_0(t)$ , using Penman-Monteith method. Potential evapotranspiration rates,  $\epsilon_p(t) = \epsilon_e(t) + \tau_p(t)$  (where  $\epsilon$ : evaporation,  $\tau$  - transpiration), were estimated from the  $ET_0(t)$  data using the time-

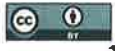

dependent crop coefficients actually used in the Yasur site. Assuming that the wetted soil surface area of the ridge is completely covered by the trees' canopy, a negligibly low soil evaporation rate was adopted for the surface area of the ridges, *i.e.*,  $\tau_p(t)=\epsilon\tau_p(t)$ . For the soil surface area between the ridges outside the rooted zone, a negligibly small transpiration rate was assumed, *i.e.*,  $\epsilon_p(t)=\epsilon\tau_p(t)$ . Actual rates of water loss by evaporation,  $\epsilon_a(t)$ , were implemented by a MI approach described in Russo et al. (2006).

The chamber base was modeled as a cuboid whose axes coincide with the coordinates of the flow system. The center of a given chamber base is located at a given, user-controlled point,  $p=p(x_2, x_3)$ , in the  $x_2x_3$ -horizontal plane; it extends vertically from the soil surface,  $x_1=0$ , to the depth of  $x_1=Z_{\text{bot}}$ , and horizontally from  $x_{e21}=p-\delta x_2$  to  $x_{e22}=p+\delta x_2$  and from  $x_{e31}=p-\delta x_3$  to  $x_{e32}=p+\delta x_3$ , where  $Z_{\text{bot}}=0.10\text{m}$  and  $\delta x_2=\delta x_3$  vary between 0.1m to 0.2m. Unit-head-gradient is specified at  $x_1=Z_{\text{bot}}$ , and no-flow is specified at  $x_1=0$  and at the vertical planes of the chamber located at  $x_{e21}$  and  $x_{e22}$  and at  $x_{e31}$  and  $x_{e32}$ .

Appropriate initial conditions for the present analyses were created by considering measured water content and solutes' concentrations profiles obtained prior to the irrigation season. For the flow, a second-type upper boundary condition was imposed on the top boundary ( $x_1=0$ ) with flux that is determined by the drippers' discharge and by the time-dependent potential soil evaporation flux. A unit-head-gradient-boundary was specified at the bottom boundary ( $x_1=L_1$ ). For the transport, a first-type upper boundary condition was imposed on the top boundary with inlet concentrations corresponding to the irrigation water concentrations. A zero-gradient-boundary was specified at the bottom boundary. No-flow conditions are assumed for the vertical boundaries located at  $x_2=0$ ,  $x_2=L_2$ ,  $x_3=0$ , and  $x_3=L_3$  (Fig. SI-1)

For a given location at the horizontal  $x_2x_3$ -plane and a given horizontal extent of the chamber base, starting at the beginning of the irrigation season (May 1<sup>st</sup>), flow and transport simulations proceeded for an irrigation period of 180d. Actual concentrations of nitrate and ammonium in the irrigation water (including amounts added as fertilizers) and concentration of chloride in the irrigation water used in the field experiments were implemented in the simulations.

### 2.3. Statistics

Data were analyzed using JMP® Pro Statistical Software version 15.0 (SAS Institute Inc., USA). For each base size or location, we used a t-test to analyze the effects of the base on the different variables. The data met the assumption of homogeneity of variances. Presented data are means  $\pm$  standard error (SE), with  $p$  values ( $p$ ) representing the level of statistical significance.

## 3. Results

### 3.1. Measured N<sub>2</sub>O fluxes in the field

Results from two years of measuring showed that the N<sub>2</sub>O fluxes were higher during the fertigation season (April through October) than during the winter period (November through March). During the winter, no significant differences were observed between the measured N<sub>2</sub>O<sub>in</sub> and N<sub>2</sub>O<sub>Adjacent</sub> fluxes. In contrast, during the irrigation/fertigation season, the N<sub>2</sub>O fluxes from the chambers with a dripper at their bases (N<sub>2</sub>O<sub>in</sub>) were on average 2.3 $\pm$ 0.56 times greater than the fluxes from the chambers adjacent to the dripper (N<sub>2</sub>O<sub>Adjacent</sub>) (0.82  $\pm$  0.15 vs. 0.36  $\pm$  0.05) (Fig. 2). In 4.3% of the samples, N<sub>2</sub>O<sub>Adjacent</sub> fluxes were

units? )  
6  $\text{ng m}^{-2} \text{s}^{-1}$

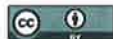

220 higher than the  $N_2O_{in}$  fluxes. This phenomenon only occurred when the measured fluxes were very low  
( $<0.01 \text{ ng cm}^{-2} \text{ sec}^{-1}$ ) in both locations and only following irrigation events and not fertigation events  
(Fig. 2). In 17% of the measurements, the  $N_2O_{in}$  and  $N_2O_{Adjacent}$  fluxes differed by 20% or less (Fig. 2).

### 3.2. Simulation results

225 Simulation results show that during irrigation, the WFPS down the soil profile under the chamber's base  
(20 cm ID), with a dripper at its center (WFPS<sub>in</sub>), were higher than the WFPS under a normal  
representative dripper with no base (WFPS<sub>No</sub>) (Fig. 3A and Fig. 4D). A day after the irrigation, the  
WFPS<sub>in</sub> decreased faster, leaving the soil profile under the WFPS<sub>No</sub> treatments wetter. Throughout the  
simulation period (i.e., from day five onwards), the WFPS at depths of 10, 20 and 30 cm hardly differ,  
and the WFPS<sub>in</sub> ranged from 0.77 to 0.63, while the WFPS<sub>No</sub> ranged from 0.74 to 0.65.

230 Ammonium-N ( $NH_4^+-N$ ) concentrations in and under the chamber's base ( $NH_4^+-N_{in}$ ) increased  
at all depths from  $\sim 5 \text{ mg L}^{-1}$  at the start of the simulation to  $\sim 25 \text{ mg L}^{-1}$  following 20 days. After 20 days,  
the concentrations remained high with minor changes. In contrast, the concentrations under a normal  
representative dripper with no base ( $NH_4^+-N_{No}$ ) slightly increased during the 60 days of simulation (from  
5 to  $8 \text{ mg L}^{-1}$ ) (Fig. 3B). Unlike with the  $NH_4^+-N$  concentration, nitrate-N ( $NO_3^- - N$ ) concentrations  
235 showed a clear oscillating trend over time that corresponded to the N concentration in the fertigation  
solution (Fig. 3C). The amplitude of change was higher when the dripper was placed inside the base.

240 Simulations with bases of variable sizes (i.e., no-base, 20, 30, and 40 cm ID) showed a clear  
size impact on the average  $NH_4^+-N$  and  $NO_3^- - N$  concentrations in the top 10 cm of the soil (Fig. 5). For  
 $NO_3^- - N$ , the smaller the base ID is, the higher the deviation from ambient (no-base) concentrations.  
During fertigation events,  $NO_3^- - N$  concentrations inside the 20, 30, and 40 cm bases increased by up to  
212%, 159%, and 137%, respectively, relative to a dripper with no base around it. In contrast, between  
fertigation events, the concentrations decreased down to 10%, 32%, and 61% of the concentrations under  
a dripper with no base. Unlike the oscillating trend of  $NO_3^- - N$  concentrations,  $NH_4^+-N$  concentrations  
245 during the simulated 60 days of fertigation gradually accumulated in the soil until they stabilized at  
around  $20 \text{ mg L}^{-1}$ . The sharpest buildup was observed under the 20 and 30 cm ID bases where the  $NH_4^+-N$   
concentrations were up to 300 times greater than the concentrations under a dripper with no-base (Figs.  
5).

250 Simulated  $N_2O$  emissions showed a clear oscillating trend over time, which was affected by the  
irrigation and fertigation regime (Fig. 6). During fertigation events,  $N_2O$  fluxes from the 20 cm ID base  
were on average higher by  $14 \pm 6\%$  ( $p = 0.0345$ ) than the fluxes from a dripper with no base, with higher  
fluxes from deeper parts ( $< 10 \text{ cm}$ ) of the soil (Fig. 4C). However, the fluxes from the 30 and 40 cm ID  
bases were lower by  $10 \pm 5\%$  and  $26 \pm 4\%$ , respectively ( $p < 0.001$ , both). A day after a fertigation event,  
the fluxes from the 20, 30, and 40 cm ID chambers were  $-4 \pm 10\%$ ,  $-14 \pm 5\%$ , and  $-26 \pm 3\%$  lower than the  
fluxes from a dripper with no base ( $p < 0.008$ , all). More than one day after fertigation, the fluxes from  
255 the 20, 30, and 40 cm ID chambers were significantly lower than from a dripper with no base, with the  
greatest reduction in the 20 cm ID base ( $-69 \pm 3\%$ ,  $-42 \pm 4\%$ , and  $-24 \pm 3\%$ ). Irrigation events a day or two  
days following fertigations drastically reduced the  $N_2O$  fluxes, leading to fluxes that equaled  $33 \pm 6\%$ ,  
 $67 \pm 8\%$ , and  $85 \pm 5\%$  of the fluxes measured from a dripper with no base.

✓  
CHECK.  
Figure 3  
caption it  
states  
"3B" is  
 $NO_3^-$  but  
it should  
state "3C".

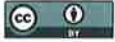

correlation  $\Rightarrow r$   
regression  $\Rightarrow r^2$

Under a dripper with no-base and a 40 cm ID base, simulated  $N_2O$  emission was significantly ( $p < 0.05$ ) affected by the simulated WFPS,  $NH_4^+-N$ , and  $NO_3^- -N$  concentrations at depths of 10, 20, and 30 cm below the surface, with  $R^2$  correlations of 0.10, 0.20 and 0.99, respectively (Table SI-2 and Table SI-3). In contrast, under bases with a 20 and 30 cm ID, simulated  $N_2O$  emissions were significantly affected only by the simulated  $NO_3^- -N$  concentrations (Table SI-1, and Table SI-2, Table SI-3).

#### 4. Discussion

Our field measurements show that  $N_2O_{Adjacent}$  fluxes may be higher than the  $N_2O_{In}$  fluxes following irrigation events or several days after fertigation events (Fig. 2). These values suggest either higher WFPS or higher concentration of N in the base adjacent to the dripper. Simulation results show that the differences in the WFPS between a base with a dripper at its center and between an undisturbed dripper are in the range of  $\pm 4\%$  following irrigations every other day (Fig 3A). It also shows that these differences can be greater ( $\pm 8\%$ ), especially at a depth of 30 cm, following sporadic irrigation events or irrigation events at the start of the growing season (Fig 3A and Fig. 4D). Analysis of the simulations results shows that the WFPS had a significant impact on the  $N_2O$  fluxes only when no base was used ( $R^2 < 0.004$ ,  $p > 0.598$  vs.  $R^2 < 0.094$ ,  $p < 0.009$ ) (Table SI-3). Published literature shows that the WFPS- $N_2O$  relation is not always clear.  $N_2O$  emissions were thought to have their optimum in the range of 70–80% water-filled pore space (WFPS) depending on soil type (Davidson et al., 2000). At higher soil water content, the major end product of denitrification is  $N_2$ . Nevertheless, a comprehensive study of 51 soils across Europe showed that most soils had their optimum  $N_2O$  emissions under WFPS wetter than 80% (Zechmeister-Boltenstern et al., 2007). Similarly, Keller and Reiners (1994) found that  $N_2O$  emissions increased exponentially with WFPS, even at WFPS greater than 80%. Bateman and Baggs (2005) showed that the relative contribution of nitrification and denitrification to  $N_2O$  emission depended on the WFPS. Whereas at 70% and 20% WFPS, most  $N_2O$  originated from denitrification, at 35–60% WFPS, nitrification was the main process producing  $N_2O$ . Overall, the simulated WFPS indicated that the micropores in the soil remained water-filled, which permits microbial activity without water stress, while the soil macropores are air-filled, which permits relatively good aeration of the bulk of the soil, although anaerobic microsites may exist. At such WFPS, both oxidative (nitrification) and reductive (denitrification) processes are active in the soil.

suggests  $N_2O_{In}$  result from conditions more conducive to denitrification (e.g. higher WFPS) or nitrification (e.g. higher  $NH_4^+$  concentration)

It is well established that higher N concentrations lead to higher  $N_2O$  emissions (Wolff et al., 2014, 2017; Baram et al., 2018; Schellenberg et al., 2012; Alsina et al., 2013; Butterbach-Bahl et al., 2013). A clear indication of this phenomenon can be seen in Figures 3 and 4, the model's simulation of water flow and  $NO_3^-$  and  $NH_4^+$  transport in the subsurface. When the dripper is placed in the center of the base,  $NO_3^-$  concentrations in the top 30 cm may be 50–64% higher during fertigation events and up to 67% lower following irrigation or in the days following fertigation events. Inspection of the trend over time shows that, on average,  $NO_3^-$  concentrations are decreased by  $-19\% \pm 5\%$  ( $p = 0.017$ ) relative to a dripper with no base. This phenomenon results from the higher WFPS and the geometry of the base that limits lateral flow. As such, the water flow in the base is essentially 1D in the vertical direction, which expedites downward water flow and N transport into the subsurface.  $NH_4^+$  unlike  $NO_3^-$ , is

essentially 1D



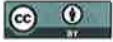

positively charged, hence readily adsorbs to the clays in the soil. Accordingly, <sup>the</sup>  $\text{NH}_4^+$  concentrations in the top 30 cm increased by 280% relative to a dripper with no base and remained higher throughout the season ( $p < 0.001$ ) (Fig. 3).

300 Inspection of the correlations between the simulated  $\text{N}_2\text{O}$  fluxes and the  $\text{NH}_4^+$  and  $\text{NO}_3^-$  concentrations show that  $\text{N}_2\text{O}$  emissions were mainly influenced by the  $\text{NH}_4^+$  and  $\text{NO}_3^-$  concentrations (Table SI-2 and Table SI-3). These, in turn, were affected by the base's ID, with higher ID leading to less biases. It is known that  $\text{N}_2\text{O}$  emission fluxes vary from one fertilizer event to another, even at the same site with the same fertilizer type under similar environmental conditions (Cowan et al., 2020). Here we  
305 show that an additional factor that must be accounted for is the location of the chamber's base relative to the water source and the perturbation that the base has on water and N-species distribution. Simulation results show that placing the dripper inside the base may increase the  $\text{N}_2\text{O}$  flux during a fertigation event by up to 52% relative to a dripper without a base. In tandem,  $\text{N}_2\text{O}$  fluxes following irrigation events or in the days following fertigation may be up to 91% lower when the dripper is placed inside the base (Fig.  
310 7A). A similar effect is observed when the chamber's base is positioned adjacent to the dripper (i.e., up to 23% increase during fertigation and up to 97% decrease following irrigation events or in the days following fertigation). One should note that the modeled  $\text{N}_2\text{O}$  fluxes resulted mainly from denitrification, as suggested by Eq. 3 and its relation to the WFPS (Fig. 3A, Table SI-2, and Table SI-3). It is evident that under a different WFPS- $\text{N}_2\text{O}_{\text{nit}}$  pattern, the base impact on the  $\text{N}_2\text{O}$  may increase in tandem with the  
315 higher  $\text{NH}_4^+$  concentrations. All of these results provide a good indication of the two opposing phenomena (a) increased WFPS, N concentrations and downward flushing when the dripper is placed inside the base, and (b) hampering of the lateral distribution of water and solutes into the most bio-active part of the soil inside the base when the base is placed adjacent to the dripper.

Comparison of cumulative  $\text{N}_2\text{O}$  emission measured in 2018, 2019, and 2020 showed the  $\text{N}_2\text{O}_{\text{in}}$   
320 flux to be 50% – 60% higher than the  $\text{N}_2\text{O}_{\text{Adjacent}}$  flux (98 – 120  $\text{mg m}^{-2}$  vs. 60 – 74  $\text{mg m}^{-2}$ ). Simulation results showed similar differences between the two ( $\text{N}_2\text{O}_{\text{in}}$  ~68% higher, 9.53 vs. 6.48  $\text{mg N}_2\text{O-N m}^{-2}$  over 60 days) (Fig. 7B). It also shows that both methods underestimate the "true" cumulative flux from a dripper with no base by ~25% and ~50%, respectively. These values suggest that in addition to measurement errors due to suppression of the gas concentration gradient at the soil-atmosphere in static  
325 chambers (e.g., Venterea et al., 2020; Venterea, 2010), the impact of the chamber's base on the water and N distribution provides an additional level of complexity, leading to an erroneous estimate of the true  $\text{N}_2\text{O}$  flux. Accordingly, the emission factors measured in such setups (e.g., Alsina et al., 2013; Baram et al., 2018; Fentabil et al., 2016; Garland et al., 2014; Scheer et al., 2008; Tian et al., 2017; Verhoeven and Six, 2014) are likely lower than the actual emission factors.

330 The degree to which the location of the chamber's base relative to the dripper affects the  $\text{N}_2\text{O}$  flux will depend on the soil properties and on the chamber's ID. Overall, an increase in the chamber's ID will decrease the above-mentioned biases by reducing the lateral flow constraints posed by the chamber's base. An indication of this process can be seen in Figure 5 for the clayey soil used in this study. Such clayey soils have a large capillary length (i.e., tens of cm long), which supports high lateral capillary flow.  
335 Accordingly, the use of a chamber with a larger ID (i.e., the simulated 40 cm or even larger) is required

✓  
is this in results?  
✓

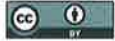

to reduce the negative effects of the base on the water distribution near the surface and to provide a more reliable representation of the ambient fluxes around drippers,

A recommendation on the diameter of the chamber's base follows a simplified analysis of steady water flow from either a dripper (emitter) with no base (an undisturbed dripline) or a dripper surrounded by the cylindrical base (i.e., "In"). It is suggested to determine the diameter of the cylindrical base ( $d_{cyl}$ , cm), such that the water potential (or water content) at a chosen depth below the dripper ( $d_{ref}$ , cm) will be equal to that generated at the same depth below an undisturbed dripline with equally-spaced ( $d_{emit}$ , cm) drippers, depending on the soil capillary length ( $\alpha^{-1}$ , cm). The matric flux potential in this location ( $\Phi_{ref}$ ,  $\text{cm}^2 \text{h}^{-1}$ ) is evaluated with analytical solutions to the linearized, steady water flow equation for a surface point source confined in a strip (its width equals  $d_{emit}$ ), imitating an undisturbed single dripline, and for a surface point source in the center of a laterally-confined cylindrical domain, mimicking the dripper surrounded by the inserted-into-the-soil base wall (Eqs. [19] and [31] in Communar and Friedman (2011), respectively). The computations were performed using DIDAS (Friedman et al., (2016), <https://app.agri.gov.il/didas/>), firstly computing the  $\Phi_{ref}$  generated at depth  $d_{ref}$  under the undisturbed dripper and then determining  $d_{cyl}$  that will generate the same  $\Phi_{ref}$  at the same depth in an iterative, trial-and-error procedure.

The resulting reference water potential (Fig. 8A) and cylindrical base nomogram (Fig. 8B) are presented in a non-dimensional form corresponding to all soil textures and inter-emitter spacings and discharge rates ( $q$ ,  $\text{cm}^3 \text{h}^{-1}$ ), after normalizing all relevant lengths ( $d_{cyl}$ ,  $d_{emit}$ ,  $d_{ref}$ , cm), by the soil capillary length, ( $\alpha^{-1}$ , cm), which describes the exponential decrease of the soil's hydraulic conductivity upon drying according to the Gardner's (1958) function,  $K = K_s \exp(\alpha h)$  ( $K$  – hydraulic conductivity ( $\text{cm h}^{-1}$ ),  $K_s$  – hydraulic conductivity at water-saturation ( $\text{cm h}^{-1}$ ),  $h$  – pressure head (cm)), and reflects the dominance of capillarity over gravity forces in driving the water in partially-saturated soils. Coarse-textured, sandy soils are characterized with large  $\alpha$  ( $\text{cm}^{-1}$ ) values, and fine-textured, clayey soils with small ones.

The dimensionless matric flux potential ( $\Phi_{ref} = 8\pi\phi_{ref}/\alpha q$ ,  $\phi = K/\alpha$ , or water content or pressure head ( $h$ ) for a given soil ( $\alpha$ ) and dripper discharge rate ( $q$ )) decreases sharply with increasing distance between emitters ( $d_{emit}$ ) or with coarsening (increasing  $\alpha$ ) of the soil texture, what counts is only their product  $\alpha d_{emit}$ , and with increasing reference depth ( $\alpha d_{ref}$ ) below the emitter (Fig. 8A). At a dimensionless inter-emitter distance ( $\alpha d_{emit}$ ) of about 2, the  $\Phi_{ref}(\alpha d_{emit})$  lines flatten as the effect of the neighboring emitters weakens and the potentials converge to those generated by a single emitter (not in a dripline, dash-dotted lines, Eq. [10] in Communar and Friedman (2010b)).

The upper limit of the dimensionless inter-emitter distance ( $\alpha d_{emit}$ ) in the depicted cylindrical base nomogram (Fig. 8B) is 2, as larger spacings are not recommended to assure overlap between the wetted bulbs (Communar and Friedman, 2010b), and a dimensionless reference depth of 1 ( $\alpha d_{ref}$ ) as the processes leading to  $\text{N}_2\text{O}$  emission are occurring at shallow depths. The diameter of the equivalent cylindrical base decreases sharply with increasing distance between emitters or for more sandy soils ( $\alpha d_{emit}$ ), the plotted ratio,  $d_{cyl}/d_{emit}$ , is approximately proportional to  $(\alpha d_{emit})^{-1/3}$ . This is so because the relative (dimensionless) effect of the parallel strip walls (i.e., of the neighboring emitters) increases with

some results + methods?

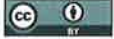

375  $d_{emit}$ . However, the dependence of  $d_{cyl}/d_{emit}$  on the reference depth ( $\alpha d_{ref}$ ) is mild, a slight increase with  
depth of reference locations for small inter-emitter spacings (or for clayey soils), and virtually  
independence for large inter-emitter spacings (or for sandy soils). This is good news, as it means that an  
equivalent cylindrical base of chosen diameter can provide similar water contents at a range of depths  
below the dripper. The diameter of the equivalent cylindrical base is larger than the inter-emitter spacing  
380 ( $d_{cyl}/d_{emit} > 1$ ) for smaller inter-emitter spacing, or for fine-texture soils, and slightly smaller than the  
inter-emitter spacing ( $d_{cyl}/d_{emit} < 1$ ) for larger inter-emitter spacing, or for coarse-texture soils (Fig. 8B).  
As written above, intuitively, it is expected that since an infinitely-deep cylinder confines lateral water  
flow in all directions, while the symmetry vertical planes between drippers along the dripline confines it  
only in the direction of the dripline,  $d_{cyl}$  should be larger than  $d_{emit}$ . These results agree with the simulation  
385 results discussed above, demonstrating mostly larger differences compared to undisturbed drippers for  
bases of smaller diameters (Figs.5 and 6). As a sensible inter-emitter spacing is about one capillary length,  
i.e.,  $\alpha d_{emit} = 1$ , the recommended  $d_{cyl}/d_{emit}$  is about one (Fig. 8B), a base diameter equal to the inter-emitter  
spacing. Notice that the  $d_{cyl}/d_{emit}(\alpha d_{emit}, \alpha d_{ref})$  nomogram is independent of the dripper discharge rate  
( $q$ ), since according to the linearized water flow equation used for the analysis (Eq. [5] in Communar and  
390 Friedman (2010), the matric flux potential generated by the drippers (point sources) is simply  
proportional to  $q$ , whatever is the geometry of the flow field.

*speaking*

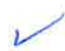

The use of the nomogram is very simple. Suppose we want to determine the diameter of a  
cylindrical base ( $d_{cyl}$ ) that will optimally reproduce the wetting patterns under 50 cm-spaced drippers  
( $d_{emit}$ ) along a single dripline in a clayey soil with a capillary length ( $\alpha^{-1}$ ) of 100 cm, by requiring that the  
395 water potential (content) at a depth ( $d_{ref}$ ) of 25 cm below the dripper will be the same. The dimensional  
emitter spacing ( $\alpha d_{emit}$ ) is thus 0.5, and the vertical arrow stops at the dimensionless reference depth  
( $\alpha d_{ref}$ ) of 0.25 (black solid line in Fig. 8B), from which the horizontal arrow stretches to approximately  
 $d_{cyl}/d_{emit} = 1.21$ , i.e., the cylindrical base diameter should be larger by 21% compared to the inter-emitter  
spacing, about 60 cm. The soil capillary lengths ( $\alpha^{-1}$ ) of most agricultural soils vary between  
400 approximately 10 cm for sandy soils to 100 cm for structureless, clayey soils with common values of 20  
to 40 cm for loams and fine sands (Friedman et al., 2016). If the value of the hydraulic conductivity at  
saturation is known, the soil capillary length can be evaluated with the universal relationship  $\alpha =$   
 $0.04035 K_s^{1/2}$  (in which  $\alpha$  is measured in  $cm^{-1}$  and  $K_s$  in  $cm\ h^{-1}$ ) (Fig. 12 in Communar and Friedman  
(2010), also used in DIDAS).

405 The analysis used for constructing the  $d_{cyl}/d_{emit}(\alpha d_{emit}, \alpha d_{ref})$  nomogram is based on addressing  
only water flow and applying multiple simplifying assumptions of steady flow, assuming an infinitely  
deep confining cylinder (as opposed to the just a few centimeters insertion of the chamber base, although  
the effect of 10 cm insetion seems to affect the wetting patterns at large depths, Fig. 4D) and disregarding  
water uptake by plant roots and evaporation from the soil surface. Yet, it is believed that it provides  
410 plausible guidelines for choosing the optimal inserted-into-the-soil base diameter. In parallel,  
minimizing the depth to which bases are inserted to 1-2 cm will lower its impact on the water and N-  
species distribution inside it. This is especially true when short closure times are needed, such as when  
portable gas analyzers are used in the field. An alternative option is to develop a static chamber that does

*Potentially if you have high wFPS  
irrigate due to dripper  
soil slow lateral  
or so shallow  
inset*

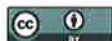

not need a base. All of the above are crucial steps that are required to obtain accurate observations on  
415 which small- and large-scale climate prediction models are built.

## 5. Conclusions

Based on two years of field measurements and numerical simulations of water flow, N-species transport  
and reactions (i.e., nitrate and ammonium), and N<sub>2</sub>O emissions, we conclude that the bases of static  
chambers provide an underestimation of N<sub>2</sub>O emissions when used in drip-irrigation. This is an outcome  
420 of: (a) increased water contents and N concentrations, and downward flushing when the dripper is placed  
inside the base, and (b) hampering of the lateral distribution of water and solutes into the most bio-active  
part of the soil inside the base when the base is placed adjacent to the dripper. A nomogram is proposed  
to determine the optimal diameter of a cylindrical base to be used along a single dripline. Further study  
is suggested to determine the optimal insertion depth of bases based on the enclosure period. An alternative  
425 option is to develop a static chamber that does not need a base.

## 6. Author contribution

S. Baram and A. Bar-Tal supervised the project and acquired financial support. Baram designed the  
experiments, analyzed the data, and wrote the manuscript with contributions from all co-authors. D.  
Russo performed the detailed numerical simulations, and S. Friedman devised the equivalent cylinder  
430 nomogram. A. Gal collected the data in the field.

## 7. Acknowledgment

The study was funded by The Office of the Chief Scientist, Ministry of Agriculture and Rural  
Development, Israel, Grant No.20-03-0027.

## 8. References

- 435 Alsina, M. M., Fanton-Borges, A. C., and Smart, D. R.: Spatiotemporal variation of event related N<sub>2</sub>O  
and CH<sub>4</sub> emissions during fertigation in a California almond orchard, 4, art1,  
<https://doi.org/10.1890/ES12-00236.1>, 2013.
- Baram, S., Dabach, S., Jerszurki, D., Stockert, C. M., and Smart, D. R.: Upscaling point measurements  
of N<sub>2</sub>O emissions into the orchard scale under drip and microsprinkler irrigation, *Agric. Ecosyst.*  
440 *Environ.*, 265, 103–111, <https://doi.org/10.1016/j.agee.2018.05.022>, 2018.
- Bateman, E. J. and Baggs, E. M.: Contributions of nitrification and denitrification to N<sub>2</sub>O emissions  
from soils at different water-filled pore space, *Biol. Fertil. Soils*, 41, 379–388,  
<https://doi.org/10.1007/s00374-005-0858-3>, 2005.
- Burton, D. L., Zebarth, B. J., Gillam, K. M., and MacLeod, J. A.: Effect of split application of fertilizer  
445 nitrogen on N<sub>2</sub>O emissions from potatoes, *Can. J. Soil Sci.*, 88, 229–239,  
<https://doi.org/10.4141/CJSS06007>, 2008.



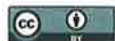

- Butterbach-Bahl, K., Baggs, E. M., Dannenmann, M., Kiese, R., and Zechmeister-Boltenstern, S.:  
Nitrous oxide emissions from soils: how well do we understand the processes and their  
controls?, *Philos. Trans. R. Soc. Lond. B. Biol. Sci.*, 368, 20130122,  
450 <https://doi.org/10.1098/rstb.2013.0122>, 2013.
- Clough, T. J., Rochette, P., Thomas, S. M., Pihlatie, M., Christiansen, J. R., and Thorman, R. E.:  
Global Research Alliance N<sub>2</sub>O chamber methodology guidelines: Design considerations, *J.  
Environ. Qual.*, 49, 1081–1091, <https://doi.org/https://doi.org/10.1002/jeq2.20117>, 2020.
- Communar, G. and Friedman, S. P.: Relative Water Uptake Rate as a Criterion for Trickle Irrigation  
455 System Design: I. Coupled Source–Sink Steady Water Flow Model, *Soil Sci. Soc. Am. J.*, 74,  
1493–1508, <https://doi.org/https://doi.org/10.2136/sssaj2009.0338>, 2010a.
- Communar, G. and Friedman, S. P.: Relative Water Uptake Rate as a Criterion for Trickle Irrigation  
System Design: II. Surface Trickle Irrigation, *Soil Sci. Soc. Am. J.*, 74, 1509–1517,  
<https://doi.org/https://doi.org/10.2136/sssaj2009.0339>, 2010b.
- 460 Communar, G. and Friedman, S. P.: General Solution for Steady Infiltration and Water Uptake in Strip-  
Shaped, Rectangular, and Cylindrical Domains, *Soil Sci. Soc. Am. J.*, 75, 2085–2094,  
<https://doi.org/https://doi.org/10.2136/sssaj2011.0088>, 2011.
- Cowan, N., Levy, P., Maire, J., Coyle, M., Leeson, S. R., Famulari, D., Carozzi, M., Nemitz, E., and  
Skiba, U.: An evaluation of four years of nitrous oxide fluxes after application of ammonium  
465 nitrate and urea fertilisers measured using the eddy covariance method, *Agric. For. Meteorol.*,  
280, 107812, <https://doi.org/https://doi.org/10.1016/j.agrformet.2019.107812>, 2020.
- Davidson, E. A., Keller, M., Erickson, H. E., Verchot, L. V., and Veldkamp, E.: Testing a Conceptual  
Model of Soil Emissions of Nitrous and Nitric Oxides Using two functions based on soil  
nitrogen availability and soil water content, the hole-in-the-pipe model characterizes a large  
470 fraction of the observed variation of nitric oxide and nitrous oxide emissions from soils,  
*Bioscience*, 50, 667–680, [https://doi.org/10.1641/0006-3568\(2000\)050\[0667:tacmos\]2.0.co;2](https://doi.org/10.1641/0006-3568(2000)050[0667:tacmos]2.0.co;2),  
2000.
- Eshel, G., Levy, G. J., Mingelgrin, U., and Singer, M. J.: Critical Evaluation of the Use of Laser  
Diffraction for Particle-Size Distribution Analysis, *Soil Sci. Soc. Am. J.*, 68, 736–743,  
475 <https://doi.org/https://doi.org/10.2136/sssaj2004.7360>, 2004.
- Fentabil, M. M., Nichol, C. F., Jones, M. D., Neilsen, G. H., Neilsen, D., and Hannam, K. D.: Effect of  
drip irrigation frequency, nitrogen rate and mulching on nitrous oxide emissions in a semi-arid  
climate: An assessment across two years in an apple orchard, *Agric. Ecosyst. Environ.*, 235,  
242–252, 2016.
- 480 Friedman, S. P., Communar, G., and Gamliel, A.: DIDAS – User-friendly software package for  
assisting drip irrigation design and scheduling, *Comput. Electron. Agric.*, 120, 36–52,  
<https://doi.org/10.1016/J.COMPAG.2015.11.007>, 2016.
- Gardner, W. R.: Some steady-state solutions of the unsaturated moisture flow equation with application  
to evaporation from a water table, *Soil Sci.*, 4, 228–232, <https://doi.org/10.1097/00010694->  
485 [195804000-00006](https://doi.org/10.1097/00010694-195804000-00006), 1958.
- Garland, G. M., Suddick, E., Burger, M., Horwath, W. R., and Six, J.: Direct N<sub>2</sub>O emissions from a

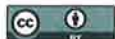

- Mediterranean vineyard: Event-related baseline measurements, *Agric. Ecosyst. Environ.*, 195, 44–52, <https://doi.org/https://doi.org/10.1016/j.agee.2014.05.018>, 2014.
- 490 van Genuchten, M. T.: A Closed-form Equation for Predicting the Hydraulic Conductivity of Unsaturated Soils, *Soil Sci. Soc. Am. J.*, 44, 892–898, 1980.
- Healy, R. W., Striegl, R. G., Russell, T. F., Hutchinson, G. L., and Livingston, G. P.: Numerical Evaluation of Static-Chamber Measurements of Soil–Atmosphere Gas Exchange: Identification of Physical Processes, *Soil Sci. Soc. Am. J.*, 60, 740–747, <https://doi.org/https://doi.org/10.2136/sssaj1996.03615995006000030009x>, 1996.
- 495 Heller, H., Bar-Tal, A., Tamir, G., Bloom, P., Venterea, R. T., Chen, D., Zhang, Y., Clapp, C. E., and Fine, P.: Effects of Manure and Cultivation on Carbon Dioxide and Nitrous Oxide Emissions from a Corn Field under Mediterranean Conditions, *J. Environ. Qual.*, 39, 437, <https://doi.org/10.2134/jeq2009.0027>, 2010.
- Hénault, C. and Germon, J. C.: NEMIS, a predictive model of denitrification on the field scale, *Eur. J. Soil Sci.*, 51, 257–270, <https://doi.org/https://doi.org/10.1046/j.1365-2389.2000.00314.x>, 2000.
- 500 Hénault, C., Bourennane, H., Ayzac, A., Ratié, C., Saby, N. P. A., Cohan, J. P., Eglin, T., and Gall, C. Le: Management of soil pH promotes nitrous oxide reduction and thus mitigates soil emissions of this greenhouse gas, *Sci. Rep.*, 9, 20182, <https://doi.org/10.1038/s41598-019-56694-3>, 2019.
- Hutchinson, G. L. and Livingston, G. P.: Vents and seals in non-steady-state chambers used for measuring gas exchange between soil and the atmosphere, *Eur. J. Soil Sci.*, 52, 675–682, <https://doi.org/https://doi.org/10.1046/j.1365-2389.2001.00415.x>, 2001.
- 505 Keller, M. and Reiners, W. A.: Soil-atmosphere exchange of nitrous oxide, nitric oxide, and methane under secondary succession of pasture to forest in the Atlantic lowlands of Costa Rica, *Global Biogeochem. Cycles*, 8, 399–409, <https://doi.org/https://doi.org/10.1029/94GB01660>, 1994.
- 510 Lotse, E. G., Jabro, J. D., Simmons, K. E., and Baker, D. E.: Simulation of nitrogen dynamics and leaching from arable soils, *J. Contam. Hydrol.*, 10, 183–196, [https://doi.org/https://doi.org/10.1016/0169-7722\(92\)90060-R](https://doi.org/https://doi.org/10.1016/0169-7722(92)90060-R), 1992.
- Mishra, S., Parker, J. C., and Singhal, N.: Estimation of soil hydraulic properties and their uncertainty from particle size distribution data, *J. Hydrol.*, 108, 1–18, [https://doi.org/https://doi.org/10.1016/0022-1694\(89\)90275-8](https://doi.org/https://doi.org/10.1016/0022-1694(89)90275-8), 1989.
- 515 Nemera, D. B., Bar-Tal, A., Levy, G. J., Lukyanov, V., Tarchitzky, J., Paudel, I., and Cohen, S.: Mitigating negative effects of long-term treated wastewater application via soil and irrigation manipulations: Sap flow and water relations of avocado trees (*Persea americana* Mill.), *Agric. Water Manag.*, 237, 106178, <https://doi.org/10.1016/j.agwat.2020.106178>, 2020.
- 520 Neuman, S. P., Feddes, R. A., and Bresler, E.: Finite Element Analysis of Two-Dimensional Flow in Soils Considering Water Uptake by Roots: I. Theory, *Soil Sci. Soc. Am. J.*, 39, 224–230, <https://doi.org/https://doi.org/10.2136/sssaj1975.03615995003900020007x>, 1975.
- Nye, P. and Tinker, P. B.: *Solute Movement in the Soil-Root System*, Blackwell Scientific Publications: Hoboken, NJ, USA, 342 pp., 1977.
- 525 Parkin, T. B. and Kaspar, T. C.: Nitrous oxide emissions from corn-soybean systems in the midwest., *J. Environ. Qual.*, 35 4, 1496–1506, 2006.

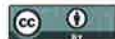

- Perkins, T. K. and Johnston, O. C.: A Review of Diffusion and Dispersion in Porous Media, *Soc. Pet. Eng. J.*, 3, 70–84, <https://doi.org/10.2118/480-PA>, 1963.
- 530 Rabot, E., Cousin, I., and Hénault, C.: A modeling approach of the relationship between nitrous oxide fluxes from soils and the water-filled pore space, *Biogeochemistry*, 122, 395–408, <https://doi.org/10.1007/s10533-014-0048-1>, 2015.
- Rochette, P. and Eriksen-Hamel, N. S.: Chamber Measurements of Soil Nitrous Oxide Flux: Are Absolute Values Reliable?, *Soil Sci. Soc. Am. J.*, 72, 331–342, <https://doi.org/https://doi.org/10.2136/sssaj2007.0215>, 2008.
- 535 Russo, D. and Bouton, M.: Statistical analysis of spatial variability in unsaturated flow parameters, *Water Resour. Res.*, 28, 1911–1925, <https://doi.org/https://doi.org/10.1029/92WR00669>, 1992.
- Russo, D. and Kurtzman, D.: Using Desalinated Water for Irrigation: Its Effect on Field Scale Water Flow and Contaminant Transport under Cropped Conditions, 11, 687, <https://doi.org/https://doi.org/10.3390/w11040687>, 2019.
- 540 Russo, D., Russo, I., and Laufer, A.: On the spatial variability of parameters of the unsaturated hydraulic conductivity, *Water Resour. Res.*, 33, 947–956, <https://doi.org/https://doi.org/10.1029/96WR03947>, 1997.
- Russo, D., Zaidel, J., Fiori, A., and Laufer, A.: Numerical analysis of flow and transport from a multiple-source system in a partially saturated heterogeneous soil under cropped conditions, *Water Resour. Res.*, 42, <https://doi.org/https://doi.org/10.1029/2006WR004923>, 2006.
- 545 Russo, D., Laufer, A., Shapira, R. H., and Kurtzman, D.: Assessment of solute fluxes beneath an orchard irrigated with treated sewage water: A numerical study, *Water Resour. Res.*, 49, 657–674, <https://doi.org/10.1002/wrcr.20085>, 2013.
- Russo, D., Laufer, A., Bardhan, G., and Levy, G. J.: Salinity control in a clay soil beneath an orchard irrigated with treated waste water in the presence of a high water table: A numerical study, *J. Hydrol.*, 531, 198–213, <https://doi.org/https://doi.org/10.1016/j.jhydrol.2015.04.013>, 2015.
- 550 Russo, D., Laufer, A., and Bar-Tal, A.: Improving water uptake by trees planted on a clayey soil and irrigated with low-quality water by various management means: A numerical study, *Agric. Water Manag.*, 229, 105891, <https://doi.org/https://doi.org/10.1016/j.agwat.2019.105891>, 2020.
- 555 Salgado, E. and Cautin, R.: Avocado root distribution in fine and coarse-textured soils under drip and microsprinkler irrigation, *Agric. Water Manag.*, 95, 817–824, 2008.
- Sanchez-Martín, L., Meijide, A., Garcia-Torres, L., and Vallejo, A.: Combination of drip irrigation and organic fertilizer for mitigating emissions of nitrogen oxides in semiarid climate, *Agric. Ecosyst. Environ.*, 137, 99–107, <https://doi.org/https://doi.org/10.1016/j.agee.2010.01.006>, 2010.
- 560 Sánchez-Martín, L., Arce, A., Benito, A., Garcia-Torres, L., and Vallejo, A.: Influence of drip and furrow irrigation systems on nitrogen oxide emissions from a horticultural crop, *Soil Biol. Biochem.*, 40, 1698–1706, <https://doi.org/https://doi.org/10.1016/j.soilbio.2008.02.005>, 2008.
- 565 Scheer, C., Wassmann, R., Kienzler, K., Ibragimov, N., and Eschanov, R.: Nitrous oxide emissions from fertilized, irrigated cotton (*Gossypium hirsutum* L.) in the Aral Sea Basin, Uzbekistan: Influence of nitrogen applications and irrigation practices, *Soil Biol. Biochem.*, 40, 290–301,

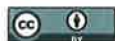

- 570 <https://doi.org/10.1016/J.SOILBIO.2007.08.007>, 2008.
- Schellenberg, D. L., Alsina, M. M., Muhammad, S., Stockert, C. M., Wolff, M. W., Sanden, B. L.,  
Brown, P. H., and Smart, D. R.: Yield-scaled global warming potential from N<sub>2</sub>O emissions and  
CH<sub>4</sub> oxidation for almond (*Prunus dulcis*) irrigated with nitrogen fertilizers on arid land, *Agric.*  
*Ecosyst. Environ.*, 155, 7–15, 2012.
- Smart, D. R., Alsina, M. M., Wolff, M. W., Matiasck, M. G., Schellenberg, D. L., Edstrom, J. P.,  
Brown, P. H., and Scow, K. M.: N<sub>2</sub>O Emissions and Water Management in California Perennial  
Crops, in: *Understanding Greenhouse Gas Emissions from Agricultural Management*, edited by:  
575 Guo, L., Gunasekara, A., and McConnell, L., ACS Symposium Series; American Chemical  
Society, Washington, DC, 227–255, 2011.
- Tian, D., Zhang, Y., Mu, Y., Zhou, Y., Zhang, C., and Liu, J.: The effect of drip irrigation and drip  
fertigation on N<sub>2</sub>O and NO emissions, water saving and grain yields in a maize field in the  
North China Plain, *Sci. Total Environ.*, 575, 1034–1040,  
580 <https://doi.org/https://doi.org/10.1016/j.scitotenv.2016.09.166>, 2017.
- Vallejo, A., Mejjide, A., Boeckx, P., Arce, A., García-torres, L., Aguado, P. L., and Sanchez-martin,  
L.: Nitrous oxide and methane emissions from a surface drip-irrigated system combined with  
fertilizer management, *Eur. J. Soil Sci.*, 65, 386–395, <https://doi.org/10.1111/ejss.12140>, 2014.
- Venterea, R. T., Petersen, S. O., de Klein, C. A. M., Pedersen, A. R., Noble, A. D. L., Rees, R. M.,  
585 Gamble, J. D., and Parkin, T. B.: Global Research Alliance N<sub>2</sub>O chamber methodology  
guidelines: Flux calculations, *J. Environ. Qual.*, 49, 1141–1155,  
<https://doi.org/https://doi.org/10.1002/jeq2.20118>, 2020.
- Venterea, R. T. V. A.-R. T.: Simplified Method for Quantifying Theoretical Underestimation of  
Chamber-Based Trace Gas Fluxes, *J. Environ. Qual.*, 39, 126–135,  
590 <https://doi.org/10.2134/jeq2009.0231>, 2010.
- Verhoeven, E. and Six, J.: Biochar does not mitigate field-scale N<sub>2</sub>O emissions in a Northern California  
vineyard: An assessment across two years, *Agric. Ecosyst. Environ.*, 191, 27–38,  
<https://doi.org/https://doi.org/10.1016/j.agecc.2014.03.008>, 2014.
- Wolff, M. W., Schellenberg, D. L., Sanden, B. L., Brown, P. H., and Smart, D. R.: Reducing Reactive-  
N Loss from Fertigation: High-Frequency Application and Fertilizer Selection, in: *Poster*  
595 *presented at the annual meeting of the Almond Board of California. Sacramento, California,*  
*USA, 2014.*
- Wolff, M. W., Hopmans, J. W., Stockert, C. M., Burger, M., Sanden, B. L., and Smart, D. R.: Effects  
of drip fertigation frequency and N-source on soil N<sub>2</sub>O production in almonds, *Agric. Ecosyst.*  
600 *Environ.*, 67–77, 2017.
- Wu, X. and Zhang, A.: Comparison of three models for simulating N<sub>2</sub>O emissions from paddy fields  
under water-saving irrigation, *Atmos. Environ.*, 98, 500–509,  
<https://doi.org/https://doi.org/10.1016/j.atmosenv.2014.09.029>, 2014.
- Zebbarth, B. J., Rochette, P., Burton, D. L., and Price, M.: Effect of fertilizer nitrogen management on  
605 N<sub>2</sub>O emissions in commercial corn fields, *Can. J. Soil Sci.*, 88, 189–195,  
<https://doi.org/10.4141/CJSS06010>, 2008.



<https://doi.org/10.5194/egusphere-2022-141>

Preprint. Discussion started: 20 April 2022

© Author(s) 2022. CC BY 4.0 License.

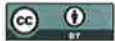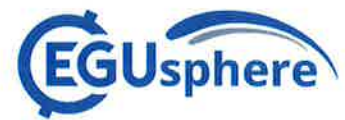

Zechmeister-Boltenstern, S., Schafler, G., and Kitzler, B.: NO<sub>2</sub>, N<sub>2</sub>O, CO<sub>2</sub> and CH<sub>4</sub> fluxes from soils under different land use: temperature sensitivity and effects of soil moisture, *Geophys. Res. Abstr.*, 8, 7968, 2007.

610

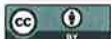

### 9. Figures

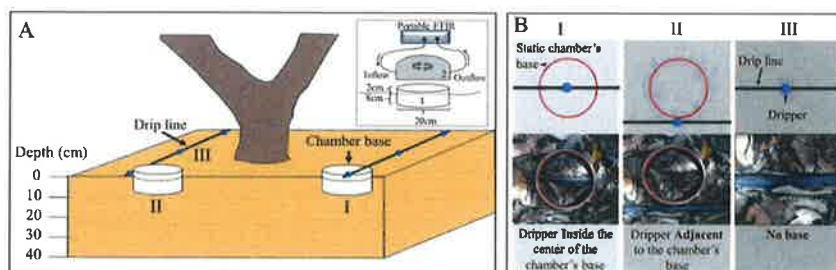

615 **Figure 1.** Schematic side view (A) and top view (B) representation of the static chamber setup used to measure  $N_2O$  fluxes in an Avocado orchard and their locations (I, II, III) relative to the drip line and the drippers.

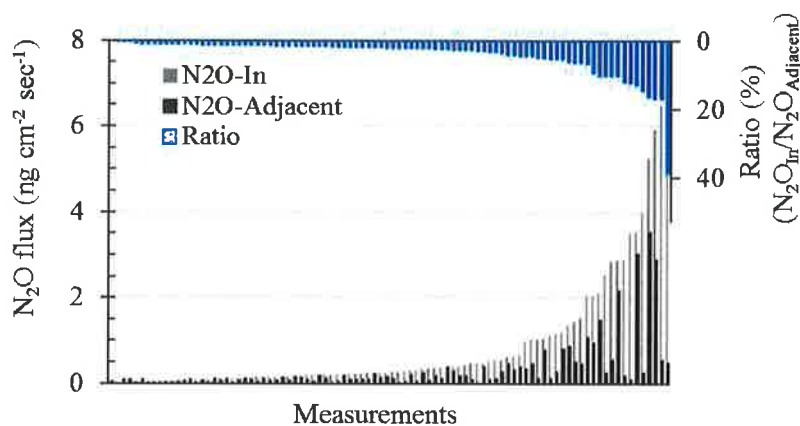

620 **Figure 2.**  $N_2O$  fluxes measured in static chambers with a dripper in their base ( $N_2O_{In}$ ) and in static chambers with a dripper adjacent to their base ( $N_2O_{Adjacent}$ ), and the ratio between  $N_2O_{In}$  and  $N_2O_{Adjacent}$  at each one of the 12 sampling locations at all sampling days.

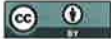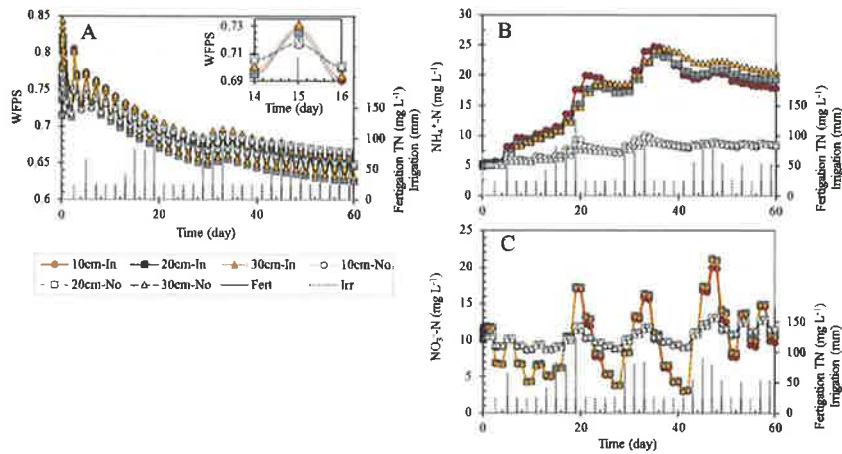

**Figure 3.** Simulation results of the change over time in (A) water filled pore space (WFPS), (B) NO<sub>3</sub><sup>-</sup>-N and (C) NH<sub>4</sub><sup>+</sup>-N concentrations at three depths (10, 20 and 30 cm) under a base of a static chambers, with a dripper at its center (filled shapes – In), and under a dripper without a base (light empty shapes – No) following irrigation every other day, and fertigation events. The top right corner of (A) shows a zoom in on the WFPS cycle during three consecutive days: the day after fertigation (day 14), the day of fertigation (day 15) and the day following the fertigation event (day 16). Total nitrogen (TN) concentration in the fertigation solution is the sum of NO<sub>3</sub><sup>-</sup>-N and NH<sub>4</sub><sup>+</sup>-N concentrations.

625

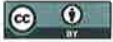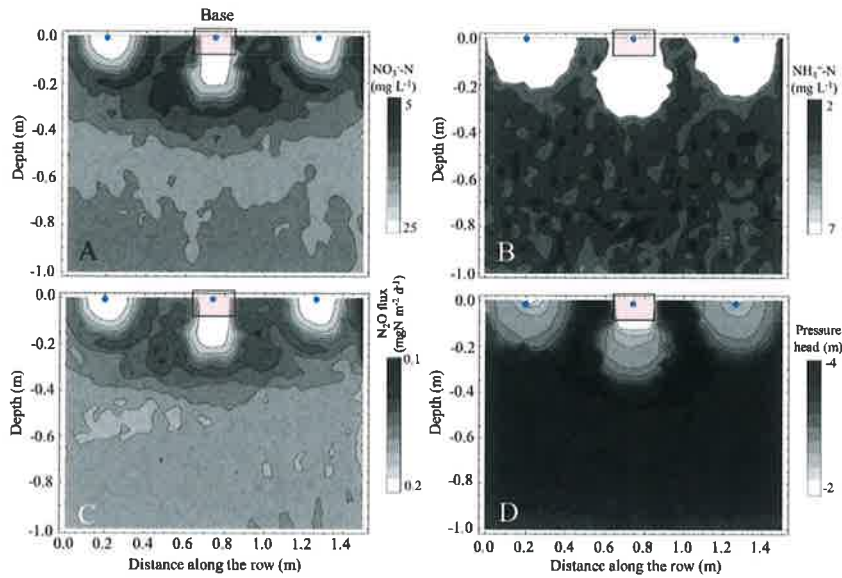

630

**Figure 4.** Contours of the simulated (A) nitrate-N ( $\text{NO}_3^-$ -N) and (B) ammonium-N ( $\text{NH}_4^+$ -N) concentrations, (C) vertical  $\text{N}_2\text{O}$  flux (positive upwards) and (D) pressure head distributions in the vertical  $x_1x_3$ -plane of the flow domain in the vicinity of one of the drip line laterals along one of the ridges whose center is located at  $x_2=5.1\text{m}$  (Fig. SI-1). The figure shows three adjacent drippers, where the center dripper is confined by a static chamber's base. The presented data is a snapshot following 30 days of fertigation.

635



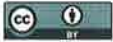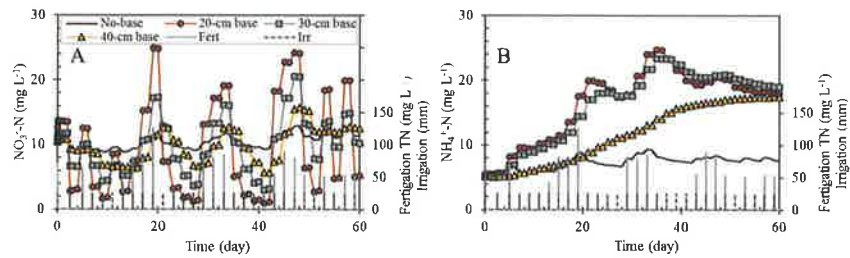

640 **Figure 5.** Simulation results of the change over time in  $\text{NO}_3^-$ -N and  $\text{NH}_4^+$ -N concentrations in the top soil (0 – 10 cm) under bases of variable sizes (i.e., no-base, 20, 30, and 40 cm internal diameter) with a dripper at their centers. Total nitrogen (TN) concentration in the fertigation solution is the sum of  $\text{NO}_3^-$ -N and  $\text{NH}_4^+$ -N concentrations.

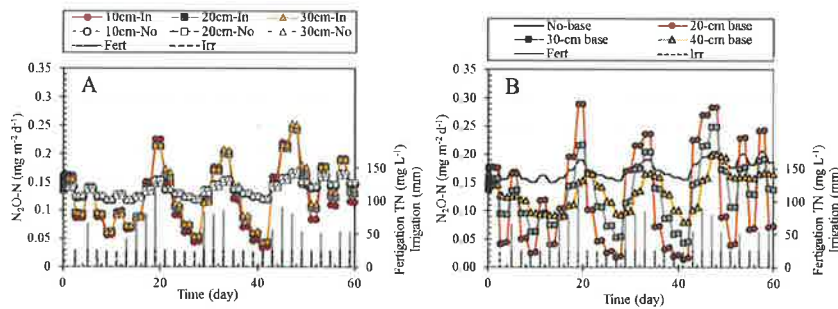

645 **Figure 6.** Simulation results of the change over time in  $\text{N}_2\text{O}$ -N fluxes (A) at 10, 20 and 30cm below a base with a dripper at its center (In) and under a dripper without a base (No), and (B) in the topsoil (0 – 10cm) under bases of variable sizes (i.e., no-base, 20, 30, and 40 cm internal diameter) with a dripper at their centers. Total nitrogen (TN) concentration in the fertigation solution is the sum of  $\text{NO}_3^-$ -N and  $\text{NH}_4^+$ -N concentrations.

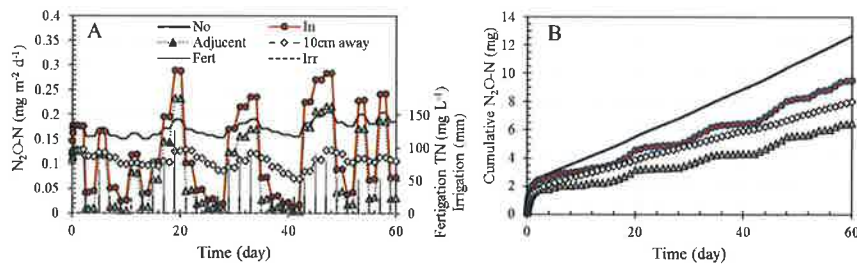

650 **Figure 7.** Simulation results of (A) daily and (B) cumulative  $\text{N}_2\text{O}$ -N emissions from the soil surface under (No) and 10 cm away from a dripper without a chamber base, from a chamber base with a dripper at its center (In) and a base adjacent to the dripper (adjacent), during consecutive fertigation events over a period of 60 days.

655

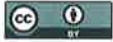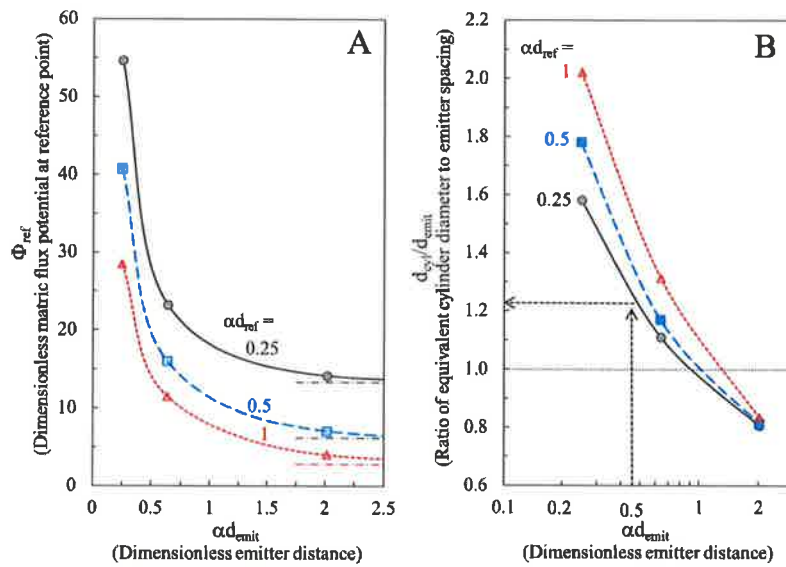

660 **Figure 8.** (A) Non-dimensional matrix flux potential ( $\Phi_{ref}$ ), and (B) the ratio between the equivalent cylindrical base diameter ( $d_{cyl}$ ) and the emitter spacing ( $d_{emit}$ ), as a function of the non-dimensional distance between emitters ( $\alpha d_{emit}$ ), for different non-dimensional depths ( $\alpha d_{ref}$ ) below the emitter. The dash-dotted lines on (A) represent  $\Phi_{ref}$  at the given depth below a single emitter.  $\Phi_{ref} = 8\pi\phi_{ref}/\alpha q$ ,  $\alpha$  is the soil's capillary lengths,  $q$  is the emitter discharge rate.
